# Supplementary material for: Multiplexed Knockouts in the Model Diatom Phaeodactylum by Episomal Delivery of a Selectable Cas9
Source: PubMed Central journal article supplement (PMC6997545; doi:10.3389/fmicb.2020.00005), 2020-01-28
Supplement: Table_1.pdf [file Table_1.pdf]

| Colony | Manual Curation | TIDE                                                           |                     |
|--------|-----------------|----------------------------------------------------------------|---------------------|
|        |                 | Predicted Mutation                                             | Predicted Genotype  |
| 1      | wild-type       | N/A                                                            | N/A                 |
| 2      | wild-type       | N/A                                                            | N/A                 |
| 3      | wild-type       | N/A                                                            | N/A                 |
| 4      | wild-type       | N/A                                                            | N/A                 |
| 5      | wild-type       | N/A                                                            | N/A                 |
| 6      | wild-type       | N/A                                                            | N/A                 |
| 7      | wild-type       | N/A                                                            | N/A                 |
| 8      | 14-bp deletion  | 1-bp insertion (adenine addition)                              | Homozygous          |
| 9      | wild-type       | N/A                                                            | N/A                 |
| 10     | wild-type       | N/A                                                            | N/A                 |
| 11     | wild-type       | N/A                                                            | N/A                 |
| 12     | 6-bp deletion   | 94.9% wild-type                                                | wild-type           |
| 13     | wild-type       | N/A                                                            | N/A                 |
| 14     | wild-type       | N/A                                                            | N/A                 |
| 15     | wild-type       | N/A                                                            | N/A                 |
| 16     | mixed           | 95.5% wild-type                                                | wild-type           |
| 17     | mixed           | 95.0% wild-type                                                | wild-type           |
| 18     | mixed           | 91.1% wild-type                                                | wild-type           |
| 19     | wild-type       | N/A                                                            | N/A                 |
| 20     | wild-type       | N/A                                                            | N/A                 |
| 21     | wild-type       | N/A                                                            | N/A                 |
| 22     | wild-type       | N/A                                                            | N/A                 |
| 23     | wild-type       | N/A                                                            | N/A                 |
| 24     | wild-type       | N/A                                                            | N/A                 |
| 25     | wild-type       | N/A                                                            | N/A                 |
| 26     | wild-type       | N/A                                                            | N/A                 |
| 27     | wild-type       | N/A                                                            | N/A                 |
| 28     | wild-type       | N/A                                                            | N/A                 |
| 29     | wild-type       | N/A                                                            | N/A                 |
| 30     | mixed           | 1-bp insertion (adenine addition) (6.6% wild-type)             | Homozygous (streak) |
| 31     | wild-type       | N/A                                                            | N/A                 |
| 32     | wild-type       | N/A                                                            | N/A                 |
| 33     | wild-type       | N/A                                                            | N/A                 |
| 34     | wild-type       | N/A                                                            | N/A                 |
| 35     | wild-type       | N/A                                                            | N/A                 |
| 36     | wild-type       | N/A                                                            | N/A                 |
| 37     | mixed           | 1-bp insertion (adenine addition)                              | Homozygous          |
| 38     | wild-type       | N/A                                                            | N/A                 |
| 39     | wild-type       | N/A                                                            | N/A                 |
| 40     | wild-type       | N/A                                                            | N/A                 |
| 41     | wild-type       | N/A                                                            | N/A                 |
| 42     | wild-type       | N/A                                                            | N/A                 |
| 43     | wild-type       | N/A                                                            | N/A                 |
| 44     | wild-type       | N/A                                                            | N/A                 |
| 45     | wild-type       | N/A                                                            | N/A                 |
| 46     | wild-type       | N/A                                                            | N/A                 |
| 47     | wild-type       | N/A                                                            | N/A                 |
| 48     | wild-type       | N/A                                                            | N/A                 |
| 49     | wild-type       | N/A                                                            | N/A                 |
| 50     | wild-type       | N/A                                                            | N/A                 |
| 51     | wild-type       | N/A                                                            | N/A                 |
| 52     | wild-type       | N/A                                                            | N/A                 |
| 53     | wild-type       | N/A                                                            | N/A                 |
| 54     | wild-type       | N/A                                                            | N/A                 |
| 55     | mixed           | mostly wild-type                                               | N/A                 |
| 56     | wild-type       | N/A                                                            | N/A                 |
| 57     | mixed           | mostly wild-type                                               | N/A                 |
| 58     | wild-type       | N/A                                                            | N/A                 |
| 59     | wild-type       | N/A                                                            | N/A                 |
| 60     | wild-type       | N/A                                                            | N/A                 |
| 61     | wild-type       | N/A                                                            | N/A                 |
| 62     | wild-type       | N/A                                                            | N/A                 |
| 63     | wild-type       | N/A                                                            | N/A                 |
| 64     | mixed           | 96.3% wild-type                                                | wild-type           |
| 65     | wild-type       | N/A                                                            | N/A                 |
| 66     | wild-type       | N/A                                                            | N/A                 |
| 67     | wild-type       | N/A                                                            | N/A                 |
| 68     | wild-type       | N/A                                                            | N/A                 |
| 69     | wild-type       | N/A                                                            | N/A                 |
| 70     | mixed           | 12-bp deletion, 2-bp deletion, 1-bp deletion (25.4% wild-type) | mixed               |
| 71     | wild-type       | N/A                                                            | N/A                 |
| 72     | wild-type       | N/A                                                            | N/A                 |
| 73     | wild-type       | N/A                                                            | N/A                 |
| 74     | wild-type       | N/A                                                            | N/A                 |
| 75     | wild-type       | N/A                                                            | N/A                 |
| 76     | wild-type       | N/A                                                            | N/A                 |
| 77     | wild-type       | N/A                                                            | N/A                 |
| 78     | wild-type       | N/A                                                            | N/A                 |
| 79     | wild-type       | N/A                                                            | N/A                 |
| 80     | wild-type       | N/A                                                            | N/A                 |
| 81 WT  | wild-type       | N/A                                                            | N/A                 |
| 82 WT  | wild-type       | N/A                                                            | N/A                 |
| 83 WT  | wild-type       | N/A                                                            | N/A                 |
| 84 WT  | wild-type       | N/A                                                            | N/A                 |
| 85 WT  | wild-type       | N/A                                                            | N/A                 |
| 86 WT  | wild-type       | N/A                                                            | N/A                 |
| 87 WT  | wild-type       | N/A                                                            | N/A                 |
| 88 WT  | wild-type       | N/A                                                            | N/A                 |

Supplemental Table 1. gNR-A cell lines genotyping
