# Supplementary material for: Multiplexed Knockouts in the Model Diatom Phaeodactylum by Episomal Delivery of a Selectable Cas9
Source: PubMed Central journal article supplement (PMC6997545; doi:10.3389/fmicb.2020.00005), 2020-01-28
Supplement: Table_2.pdf [file Table_2.pdf]

| Colony | Manual Curation | TIDE                                             |                           |
|--------|-----------------|--------------------------------------------------|---------------------------|
|        |                 | Predicted Mutation                               | Predicted Genotype        |
| 1      | 14-bp deletion  | 14-bp deletion, 9-bp deletion, 2-bp deletion     | mixed (streak)            |
| 2      | mixed           | 21-bp deletion, 11-bp deletion, 3-bp deletion    | mixed (streak)            |
| 3      | wild-type       | N/A                                              | N/A                       |
| 4      | mixed           | 2-bp insertion, 9-bp deletion                    | heterozygous              |
| 5      | 14-bp deletion  | 14-bp deletion, 9-bp deletion, 8-bp deletion     | mixed (streak)            |
| 6      | N/A             | N/A                                              |                           |
| 7      | N/A             | N/A                                              |                           |
| 8      | 15-bp deletion  | 15-bp deletion, 12-bp deletion                   | heterozygous              |
| 9      | N/A             | N/A                                              | N/A                       |
| 10     | mixed           | 42-bp deletion, 25-bp deletion, 11-bp deletion   | low mutagenesis frequency |
| 11     | mixed           | N/A                                              | N/A                       |
| 12     | mixed           | N/A                                              | N/A                       |
| 13     | mixed           | 33-bp deletion, 2-bp deletion, 1-bp insertion    | low mutagenesis frequency |
| 14     | N/A             | N/A                                              | N/A                       |
| 15     | N/A             | N/A                                              | N/A                       |
| 16     | mixed           | 18-bp deletion (28.3% wild-type)                 | mixed                     |
| 17     | 11-bp deletion  | 11-bp deletion                                   | Homozygous                |
| 18     | N/A             | N/A                                              | N/A                       |
| 19     | N/A             | N/A                                              | N/A                       |
| 20     | 8-bp deletion   | 9-bp deletion                                    | Homozygous                |
| 21     | 13-bp deletion  | 12-bp deletion                                   | Homozygous                |
| 22     | mixed           | N/A                                              | N/A                       |
| 23     | 9-bp deletion   | 11-bp deletion (5.5% wild-type)                  | mixed                     |
| 24     | 64-bp deletion  | deletion too large for TIDE analysis             | N/A                       |
| 25     | wild-type       | N/A                                              | N/A                       |
| 26     | mixed           | 15-bp deletion, 14-bp deletion, 13-bp deletion   | mixed (streak)            |
| 27     | 13-bp deletion  | 13-bp deletion, 10-bp deletion                   | Heterozygous              |
| 28     | mixed           | 13-bp deletion, 9-bp deletion                    | mixed (streak)            |
| 29     | 5-bp deletion   | 6-bp deletion, 8-bp deletion                     | heterozygous              |
| 30     | mixed           | N/A                                              | N/A                       |
| 31     | wild-type       | N/A                                              | N/A                       |
| 32     | 8-bp deletion   | 8-bp deletion                                    | Homozygous                |
| 33     | mixed           | mixed                                            | N/A                       |
| 34     | wild-type       | N/A                                              | N/A                       |
| 35     | 12-bp deletion  | 13-bp deletion, 14-bp deletion                   | heterozygous              |
| 36     | mixed           | 9-bp deletion, 6-bp deletion, 4-bp deletion      | mixed (streak)            |
| 37     | 18-bp deletion  | 18-bp deletion, 12-bp deletion                   | heterozygous (streak)     |
| 38     | N/A             | N/A                                              | N/A                       |
| 39     | mixed           | 14-bp deletion, 12-bp deletion (28.3% wild-type) | mixed                     |
| 40     | 14-bp deletion  | 14-bp deletion (5.8% wild-type)                  | mixed                     |
| 41     | N/A             | N/A                                              | N/A                       |
| 42     | 10-bp deletion  | 12-bp deletion, 1-bp deletion                    | mixed (streak)            |
| 43     | 14-bp deletion  | 16-bp deletion, 3-bp deletion                    | heterozygous              |
| 44     | 22-bp deletion  | 22-bp deletion, 19-bp deletion                   | heterozygous              |
| 45     | N/A             | N/A                                              | N/A                       |
| 46     | N/A             | N/A                                              | N/A                       |
| 47     | 18-bp deletion  | 17-bp deletion                                   | Homozygous (streak)       |
| 48     | 62-bp deletion  | deletion too large for TIDE analysis             | N/A                       |
| 49     | mixed           | N/A                                              | N/A                       |
| 50     | 10-bp deletion  | 19-bp deletion, 16-bp deletion, 1-bp deletion    | mixed (streak)            |
| 51     | mixed           | 12-bp deletion, 1-bp deletion                    | heterozygous              |
| 52     | mixed           | 9-bp deletion, 23-bp deletion                    | mixed (streak)            |
| 53     | 12-bp deletion  | 13-bp deletion, 12-bp deletion. 8-bp deletion    | mixed (streak)            |
| 54     | N/A             | N/A                                              | N/A                       |
| 55     | mixed           | 9-bp deletion (20.2% wild-type)                  | mixed                     |
| 56     | 3-bp deletion   | 3-bp deletion                                    | Homozygous                |
| 57     | N/A             | N/A                                              | N/A                       |
| 58     | wild-type       | N/A                                              | N/A                       |
| 59     | 15-bp deletion  | 16-bp deletion, 14-bp deletion (2.8% wild-type)  | mixed                     |
| 60     | 10-bp deletion  | 11-bp deletion, 12-bp deletion (2.1% wild-type)  | mixed                     |
| 61     | mixed           | 25-bp deletion, 14-bp deletion, 1-bp deletion    | mixed (streak)            |
| 62     | mixed           | N/A                                              | N/A                       |
| 63     | N/A             | N/A                                              | N/A                       |
| 64     | mixed           | N/A                                              | N/A                       |
| 65 WT  | wild-type       | N/A                                              | N/A                       |
| 66 WT  | wild-type       | N/A                                              | N/A                       |
| 67 WT  | wild-type       | N/A                                              | N/A                       |
| 68 WT  | wild-type       | N/A                                              | N/A                       |

Supplemental Table 2. gNR-B cell line genotyping
