# Supplementary material for: Multiplexed Knockouts in the Model Diatom Phaeodactylum by Episomal Delivery of a Selectable Cas9
Source: PubMed Central journal article supplement (PMC6997545; doi:10.3389/fmicb.2020.00005), 2020-01-28
Supplement: Table_3.pdf [file Table_3.pdf]

|          |                 | TIDE                                         |                           |     |
|----------|-----------------|----------------------------------------------|---------------------------|-----|
| Colonies | Manual Curation | Predicted mutation                           | Predicted Genotype        |     |
| 1        | mixed           | wild-type                                    | N/A                       | N/A |
| 2        | wild-type       | N/A                                          | N/A                       | N/A |
| 3        | 3-bp insertion  | 18-bp deletion, 9-bp deletion                | Heterozygous (streak)     |     |
| 4        | mixed           | 3-bp deletion, mixed                         | Heterozygous (streak)     |     |
| 5        | mixed           | 18-bp deletion, 14-bp deletion               | Heterozygous (streak)     |     |
| 6        | mixed           | wild-type                                    | N/A                       | N/A |
| 7        | mixed           | wild-type                                    | N/A                       | N/A |
| 8        | mixed           | 2-bp deletion                                | low mutagenesis frequency |     |
| 9        | mixed           | wild-type                                    | N/A                       | N/A |
| 10       | mixed           | 1-bp deletion, 7-bp deletion, 20-bp deletion | mixed (streak)            |     |
| 11       | mixed           | wild-type                                    | N/A                       | N/A |
| 12       | wild-type       | N/A                                          | N/A                       | N/A |
| 13       | wild-type       | N/A                                          | N/A                       | N/A |
| 14       | wild-type       | N/A                                          | N/A                       | N/A |
| 15       | 47-bp deletion  | 48-bp deletion                               | Homozygous                |     |
| 16       | mixed           | 2-bp deletion                                | low mutagenesis frequency |     |
| 17       | wild-type       | N/A                                          | N/A                       | N/A |
| 18       | mixed           | 2-bp insertion                               | low mutagenesis frequency |     |
| 19       | mixed           | low mutagenesis frequency                    | N/A                       | N/A |
| 20       | mixed           | wild-type                                    | N/A                       | N/A |
| 21       | mixed           | 1-bp deletion (4.8% wild-type)               | mixed (streak)            |     |
| 22       | wild-type       | N/A                                          | N/A                       | N/A |
| 23       | mixed           | 2-bp insertion                               | low mutagenesis frequency |     |
| 24       | mixed           | 1-bp deletion, 4-bp deletion                 | mixed (streak)            |     |
| 25       | mixed           | wild-type                                    | N/A                       | N/A |
| 26       | wild-type       | N/A                                          | N/A                       | N/A |
| 27       | mixed           | 1-bp deletion (7.1% wild-type)               | low mutagenesis frequency |     |
| 28       | wild-type       | N/A                                          | N/A                       | N/A |
| 29 WT    | wild-type       | N/A                                          | N/A                       | N/A |
| 30 WT    | wild-type       | N/A                                          | N/A                       | N/A |
| 31 WT    | wild-type       | N/A                                          | N/A                       | N/A |
| 32 WT    | wild-type       | N/A                                          | N/A                       | N/A |
