# Supplementary material for: Multiplexed Knockouts in the Model Diatom Phaeodactylum by Episomal Delivery of a Selectable Cas9
Source: PubMed Central journal article supplement (PMC6997545; doi:10.3389/fmicb.2020.00005), 2020-01-28
Supplement: Table_4.pdf [file Table_4.pdf]

|        |                      | TIDE                                           |                     |
|--------|----------------------|------------------------------------------------|---------------------|
| Colony | Manual Curation      | Predicted Mutation                             | Predicted Genotype  |
| 3      | 24-bp deletion       | 24-bp deletion (2.7% wild-type)                | Homozygous (streak) |
| 4      | 6-bp deletion        | 6-bp deletion (17.3% wild-type)                | Homozygous (streak) |
| 5      | wild-type            | N/A                                            | N/A                 |
| 10     | 12-bp deletion       | 12-bp deletion, 15-bp deletion                 | Heterozygous        |
| 15     | 6-bp deletion        | 6-bp deletion, 18-bp deletion (2.1% wild-type) | mixed               |
| 21     | 6-bp deletion, mixed | low mutagenesis frequency                      | N/A                 |
| WT1    | wild-type            | N/A                                            | N/A                 |
| WT2    | wild-type            | N/A                                            | N/A                 |

Supplemental Table 4. 2X KO genotyping (g24739 target locus)
